# Supplementary material
Source: PubMed Central journal article supplement (PMC7906675)
Supplement: mmc1.pdf [file mmc1.pdf]

# THE LANCET

## Global Health

### Supplementary appendix

This appendix formed part of the original submission and has been peer reviewed. We post it as supplied by the authors.

Supplement to: Murhekar MV, Bhatnagar T, Selvaraju S, et al. SARS-CoV-2 antibody seroprevalence in India, August–September, 2020: findings from the second nationwide household serosurvey. *Lancet Glob Health* 2021; published online Jan 27. [http://dx.doi.org/10.1016/S2214-109X\(20\)30544-1](http://dx.doi.org/10.1016/S2214-109X(20)30544-1).

# Appendix

| <b>Contents</b>                                                                                                                                                                                    | <b>Page</b> |
|----------------------------------------------------------------------------------------------------------------------------------------------------------------------------------------------------|-------------|
| 1. Appendix 1. Statistical Analysis.....                                                                                                                                                           | 2           |
| 2. Appendix 2. Figure: Unweighted proportion of individuals with SARS-CoV-2 IgG antibodies by districts, Second national SARS-CoV-2 household serosurvey, India, August – September 2020.....      | 3           |
| 3. Appendix 3: Unweighted proportion of individuals (overall and adults) with SARS-CoV-2 IgG antibodies by districts, First and second national SARS-CoV-2 serosurvey, India 2020.....             | 4-8         |
| 4. Appendix 4. Age and sex characteristics of individuals by enrolment status, Second national SARS-CoV-2 serosurvey, India, August – September 2020.....                                          | 9           |
| 5. Appendix 5. Estimated number of infections among individuals aged 10 years above and infection fatality ratio using test characteristics published by manufacturer and external evaluation..... | 10          |
| 6. Appendix 6. Prevalence of SARS-CoV-2 in various cities/states, India, 2020.....                                                                                                                 | 11          |
| 7. Appendix 7. STROBE checklist.....                                                                                                                                                               | 12-13       |

## **Appendix 1. Statistical analysis**

The survey was conducted in 70 randomly selected districts. From each selected district, 10 villages/wards were selected by probability proportional to size method. Design weights were computed by the inverse of product of probabilities at all stages of selection (i.e. selection of villages/wards within districts and households). The design weights were normalized and attached to the master dataset.

Random effects logistic regression model was used to address the clustering effect of estimates by considering district as the level. A random intercept model with design weights was used to estimate the overall seroprevalence. Further, seroprevalence estimates for other factors like Age, Gender, etc were estimated using the same model.

Seroprevalence estimates were obtained by exponentiating the log odds values obtained from the model and converting into probability and its corresponding 95% Wald confidence interval were obtained. The lme4 package from R software was used to perform the analysis.

We fitted a polynomial curve with parabolic and cubic functions to the distribution of incidence of reported cases and seroprevalence.

**Appendix 2. Figure: Unweighted proportion of individuals with SARS-CoV-2 IgG antibodies by districts, Second national SARS-CoV-2 household serosurvey, India, August – September 2020**

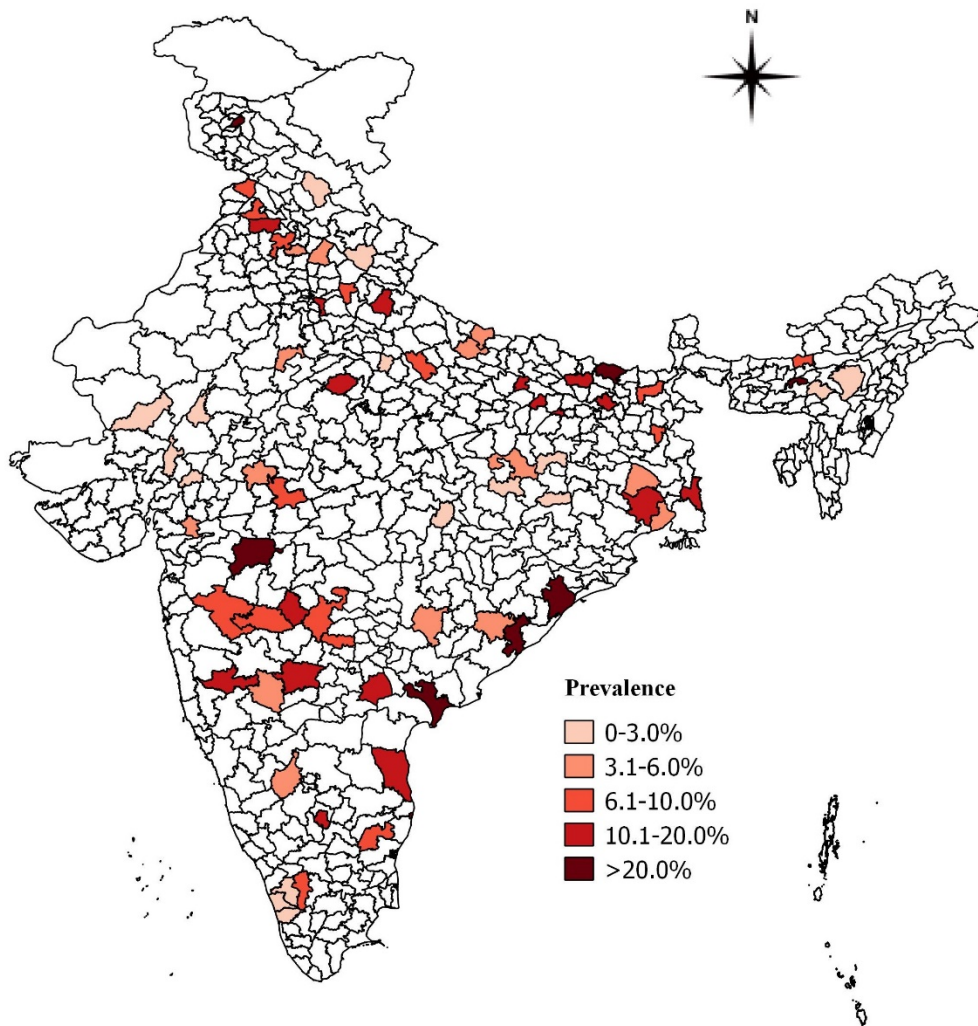

**Appendix 3: Unweighted proportion of individuals (overall and adults) with SARS-CoV-2 IgG antibodies by districts, First and second national SARS-CoV-2 serosurvey, India 2020**

| State          | District            | Serosurvey -1 Adults<br>(May- June 2020) |                     | Serosurvey – 2 Randomly selected<br>adults (Aug- Sep 2020) |                  | Serosurvey -2 Overall<br>(Aug- Sep 2020) |                     | Incidence (per<br>100,000) of<br>reported<br>COVID-19<br>cases (Aug 18) |
|----------------|---------------------|------------------------------------------|---------------------|------------------------------------------------------------|------------------|------------------------------------------|---------------------|-------------------------------------------------------------------------|
|                |                     | No.<br>tested                            | No. positive<br>(%) | No. tested                                                 | No. positive (%) | No.<br>tested                            | No. positive<br>(%) |                                                                         |
| Andhra Pradesh | Vizianagaram        | 400                                      | 6 (1.50)            | 222                                                        | 81 (36.5)        | 418                                      | 159 (38.0)          | 7578.3                                                                  |
|                | Krishna             | 397                                      | 1 (0.25)            | 265                                                        | 77 (29.1)        | 399                                      | 117 (29.3)          | 3297.2                                                                  |
|                | SPS Nellore         | 395                                      | 1 (0.25)            | 236                                                        | 48 (20.3)        | 428                                      | 76 (17.8)           | 6823.1                                                                  |
| Assam          | Karbi Anglong       | 400                                      | 0                   | 201                                                        | 5 (2.5)          | 418                                      | 11 (2.6)            | 1331.2                                                                  |
|                | Udalguri            | 400                                      | 0                   | 215                                                        | 17 (7.9)         | 412                                      | 31 (7.5)            | 1081.9                                                                  |
|                | Kamrup Metropolitan | 400                                      | 0                   | 242                                                        | 57 (23.6)        | 435                                      | 91 (20.9)           | 16250.2                                                                 |
| Bihar          | Madhubani           | 398                                      | 4 (1.00)            | 252                                                        | 59 (23.4)        | 430                                      | 102 (23.7)          | 712.7                                                                   |
|                | Purnia              | 400                                      | 4 (1.00)            | 224                                                        | 28 (12.5)        | 420                                      | 42 (10.0)           | 950.8                                                                   |
|                | Begusarai           | 400                                      | 1 (0.25)            | 178                                                        | 25 (14.0)        | 429                                      | 62 (14.4)           | 1574.6                                                                  |
|                | Muzaffarpur         | 400                                      | 2 (0.5)             | 196                                                        | 36 (18.4)        | 420                                      | 69 (16.4)           | 1003.8                                                                  |
|                | Arwal               | 398                                      | 5 (1.26)            | 188                                                        | 30 (16.0)        | 408                                      | 69 (16.9)           | 1225.7                                                                  |
|                | Buxar               | 400                                      | 5 (1.25)            | 225                                                        | 26 (11.6)        | 422                                      | 55 (13.0)           | 1271.9                                                                  |

| State            | District     | Serosurvey -1 Adults<br>(May- June 2020) |                     | Serosurvey – 2 Randomly selected<br>adults (Aug- Sep 2020) |                  | Serosurvey -2 Overall<br>(Aug- Sep 2020) |                     | Incidence (per<br>100,000) of<br>reported<br>COVID-19<br>cases (Aug 18) |
|------------------|--------------|------------------------------------------|---------------------|------------------------------------------------------------|------------------|------------------------------------------|---------------------|-------------------------------------------------------------------------|
|                  |              | No.<br>tested                            | No. positive<br>(%) | No. tested                                                 | No. positive (%) | No.<br>tested                            | No. positive<br>(%) |                                                                         |
| Chhattisgarh     | Bijapur      | 403                                      | 3 (0.74)            | 293                                                        | 16 (5.5)         | 400                                      | 22 (5.5)            | 639.6                                                                   |
|                  | Kabeerdham   | 406                                      | 1 (0.25)            | 288                                                        | 5 (1.7)          | 401                                      | 7 (1.7)             | 434.4                                                                   |
|                  | Surguja      | 401                                      | 0                   | 260                                                        | 2 (0.8)          | 398                                      | 5 (1.3)             | 824.9                                                                   |
| Gujarat          | Sabar Kantha | 400                                      | 0                   | 252                                                        | 6 (2.4)          | 402                                      | 10 (2.5)            | 260.0                                                                   |
|                  | Narmada      | 399                                      | 1 (0.25)            | 266                                                        | 10 (3.8)         | 399                                      | 13 (3.3)            | 1160.3                                                                  |
|                  | Mahisagar    | 400                                      | 1 (0.25)            | 236                                                        | 5 (2.1)          | 404                                      | 10 (2.5)            | 603.2                                                                   |
| Haryana          | Kurukshetra  | 400                                      | 1(0.25)             | 209                                                        | 12 (5.7)         | 400                                      | 20 (5.0)            | 1139.8                                                                  |
| Himachal Pradesh | Kullu        | 405                                      | 0                   | 312                                                        | 2 (0.6)          | 399                                      | 2 (0.5)             | 532.6                                                                   |
| Jammu & Kashmir  | Pulwama      | 400                                      | 3 (0.75)            | 221                                                        | 53 (24.0)        | 413                                      | 113 (27.4)          | 3601.4                                                                  |
| Jharkhand        | Pakur        | 397                                      | 3 (0.76)            | 176                                                        | 21 (11.9)        | 401                                      | 40 (10.0)           | 462.6                                                                   |
|                  | Latehar      | 398                                      | 1 (0.25)            | 131                                                        | 3 (2.3)          | 401                                      | 11 (2.7)            | 1050.1                                                                  |
|                  | Simdega      | 399                                      | 4 (1.00)            | 225                                                        | 4 (1.8)          | 399                                      | 5 (1.3)             | 1340.4                                                                  |

| State             | District        | Serosurvey -1 Adults<br>(May- June 2020) |                     | Serosurvey – 2 Randomly selected<br>adults (Aug- Sep 2020) |                  | Serosurvey -2 Overall<br>(Aug- Sep 2020) |                     | Incidence (per<br>100,000) of<br>reported<br>COVID-19<br>cases (Aug 18) |
|-------------------|-----------------|------------------------------------------|---------------------|------------------------------------------------------------|------------------|------------------------------------------|---------------------|-------------------------------------------------------------------------|
|                   |                 | No.<br>tested                            | No. positive<br>(%) | No. tested                                                 | No. positive (%) | No.<br>tested                            | No. positive<br>(%) |                                                                         |
| Karnataka         | Chitradurga     | 400                                      | 0                   | 209                                                        | 17 (8.1)         | 432                                      | 26 (6.0)            | 1202.1                                                                  |
|                   | Bengaluru Urban | 400                                      | 2 (0.50)            | 234                                                        | 44 (18.8)        | 436                                      | 81 (18.6)           | 10450.2                                                                 |
|                   | Gulbarga        | 399                                      | 1 (0.25)            | 222                                                        | 45 (20.3)        | 419                                      | 79 (18.9)           | 3830.2                                                                  |
| Kerala            | Thrissur        | 400                                      | 3 (0.75)            | 211                                                        | 4 (1.9)          | 433                                      | 5 (1.2)             | 631.8                                                                   |
|                   | Ernakulam       | 394                                      | 1 (0.25)            | 186                                                        | 3 (1.6)          | 418                                      | 4 (1.0)             | 1085.7                                                                  |
|                   | Palakkad        | 399                                      | 0                   | 193                                                        | 0                | 430                                      | 2 (0.5)             | 603.0                                                                   |
| Madhya<br>Pradesh | Gwalior         | 402                                      | 4 (1.00)            | 193                                                        | 26 (13.5)        | 438                                      | 54 (12.3)           | 2022.1                                                                  |
|                   | Ujjain          | 407                                      | 5 (1.23)            | 217                                                        | 9 (4.1)          | 418                                      | 15 (3.6)            | 831.5                                                                   |
|                   | Dewas           | 401                                      | 0                   | 234                                                        | 12 (5.1)         | 395                                      | 27 (6.8)            | 452.9                                                                   |
| Maharashtra       | Bid             | 396                                      | 2 (0.51)            | 183                                                        | 16 (8.7)         | 443                                      | 33 (7.4)            | 1169.4                                                                  |
|                   | Parbhani        | 396                                      | 3 (0.76)            | 194                                                        | 30 (15.5)        | 480                                      | 73 (15.2)           | 1010.9                                                                  |
|                   | Nanded          | 393                                      | 4 (1.02)            | 222                                                        | 23 (10.4)        | 439                                      | 43 (9.8)            | 1444.6                                                                  |
|                   | Sangli          | 400                                      | 4 (1.00)            | 182                                                        | 23 (12.6)        | 467                                      | 55 (11.8)           | 2805.8                                                                  |
|                   | Ahmadnagar      | 404                                      | 4 (1.00)            | 201                                                        | 15 (7.5)         | 447                                      | 39 (8.7)            | 3188.1                                                                  |
|                   | Jalgaon         | 396                                      | 2 (0.50)            | 175                                                        | 44 (25.1)        | 405                                      | 105 (25.9)          | 4720.4                                                                  |

| State         | District       | Serosurvey -1 Adults<br>(May- June 2020) |                     | Serosurvey – 2 Randomly selected<br>adults (Aug- Sep 2020) |                  | Serosurvey -2 Overall<br>(Aug- Sep 2020) |                     | Incidence (per<br>100,000) of<br>reported<br>COVID-19<br>cases (Aug 18) |
|---------------|----------------|------------------------------------------|---------------------|------------------------------------------------------------|------------------|------------------------------------------|---------------------|-------------------------------------------------------------------------|
|               |                | No.<br>tested                            | No. positive<br>(%) | No. tested                                                 | No. positive (%) | No.<br>tested                            | No. positive<br>(%) |                                                                         |
| Odisha        | Ganjam         | 400                                      | 3 (0.75)            | 293                                                        | 129 (44.0)       | 418                                      | 178 (42.6)          | 4343.8                                                                  |
|               | Rayagada       | 399                                      | 1 (0.25)            | 286                                                        | 69 (24.1)        | 404                                      | 98 (24.3)           | 3017.8                                                                  |
|               | Koraput        | 403                                      | 3 (0.74)            | 240                                                        | 13 (5.4)         | 401                                      | 18 (4.5)            | 1719.8                                                                  |
| Punjab        | Gurdaspur      | 400                                      | 0                   | 224                                                        | 17 (7.6)         | 400                                      | 33 (8.3)            | 635.9                                                                   |
|               | Ludhiana       | 400                                      | 0                   | 213                                                        | 45 (21.1)        | 399                                      | 75 (18.8)           | 2840.4                                                                  |
|               | Patiala        | 399                                      | 3 (0.75)            | 188                                                        | 15 (8.0)         | 399                                      | 33 (8.3)            | 1495.7                                                                  |
|               | Jalandhar      | 400                                      | 0                   | 219                                                        | 18 (8.2)         | 400                                      | 39 (9.8)            | 2157.4                                                                  |
| Rajasthan     | Rajsamand      | 396                                      | 2 (0.51)            | 222                                                        | 4 (1.8)          | 409                                      | 7 (1.7)             | 882.3                                                                   |
|               | Jalor          | 395                                      | 2 (0.51)            | 155                                                        | 4 (2.6)          | 396                                      | 7 (1.8)             | 557.9                                                                   |
|               | Dausa          | 397                                      | 4 (1.00)            | 171                                                        | 6 (3.5)          | 407                                      | 13 (3.2)            | 293.8                                                                   |
| Tamil<br>Nadu | Tiruvannamalai | 400                                      | 5 (1.25)            | 265                                                        | 27 (10.2)        | 410                                      | 35 (8.5)            | 3532.2                                                                  |
|               | Coimbatore     | 400                                      | 5 (1.25)            | 259                                                        | 22 (8.5)         | 428                                      | 31 (7.2)            | 3000.9                                                                  |
|               | Chennai        | 400                                      | 6 (1.51)            | 258                                                        | 94 (36.4)        | 421                                      | 141 (33.5)          | 19024.4                                                                 |
| Telangana     | Jangoan        | 405                                      | 0                   | 181                                                        | 29 (16.0)        | 454                                      | 83 (18.3)           | 424.1                                                                   |
|               | Kamareddy      | 404                                      | 1 (0.25)            | 200                                                        | 13 (6.5)         | 433                                      | 30 (6.9)            | 484.3                                                                   |
|               | Nalgonda       | 403                                      | 1 (0.25)            | 180                                                        | 18 (10.0)        | 422                                      | 47 (11.1)           | 700.0                                                                   |



| State            | District               | Serosurvey -1 Adults<br>(May- June 2020) |                     | Serosurvey – 2 Randomly selected<br>adults (Aug- Sep 2020) |                  | Serosurvey -2 Overall<br>(Aug- Sep 2020) |                     | Incidence (per<br>100,000) of<br>reported<br>COVID-19<br>cases (Aug 18) |
|------------------|------------------------|------------------------------------------|---------------------|------------------------------------------------------------|------------------|------------------------------------------|---------------------|-------------------------------------------------------------------------|
|                  |                        | No.<br>tested                            | No. positive<br>(%) | No. tested                                                 | No. positive (%) | No.<br>tested                            | No. positive<br>(%) |                                                                         |
| Uttar<br>Pradesh | Balrampur              | 407                                      | 2 (0.49)            | 106                                                        | 5 (4.7)          | 408                                      | 14 (3.4)            | 1058.7                                                                  |
|                  | Gonda                  | 403                                      | 1 (0.25)            | 161                                                        | 3 (1.9)          | 413                                      | 13 (3.1)            | 473.9                                                                   |
|                  | Bareilly               | 408                                      | 3 (0.74)            | 214                                                        | 23 (10.7)        | 400                                      | 48 (12.0)           | 997.9                                                                   |
|                  | Unnao                  | 402                                      | 1 (0.25)            | 190                                                        | 15 (7.9)         | 400                                      | 26 (6.5)            | 409.9                                                                   |
|                  | Mau                    | 423                                      | 2 (0.47)            | 154                                                        | 17 (11.0)        | 406                                      | 53 (13.1)           | 435.8                                                                   |
|                  | Auraiya                | 383                                      | 1 (0.26)            | 219                                                        | 4 (1.8)          | 400                                      | 4 (1.0)             | 607.7                                                                   |
|                  | Gautam Buddha<br>Nagar | 398                                      | 3 (0.75)            | 192                                                        | 32 (16.7)        | 400                                      | 50 (12.5)           | 4807.4                                                                  |
|                  | Saharanpur             | 391                                      | 1 (0.26)            | 181                                                        | 4 (2.2)          | 402                                      | 18 (4.5)            | 605.3                                                                   |
| Uttarakha<br>nd  | Jyotiba Phule Nagar    | 401                                      | 1 (0.25)            | 182                                                        | 11 (6.0)         | 399                                      | 30 (7.5)            | 613.5                                                                   |
|                  | Garhwal                | 400                                      | 1 (0.25)            | 266                                                        | 7 (2.6)          | 400                                      | 9 (2.3)             | 598.7                                                                   |
| West<br>Bengal   | Alipurduar             | 400                                      | 5 (1.25)            | 220                                                        | 27 (12.3)        | 425                                      | 61 (14.4)           | 690.6                                                                   |
|                  | Bankura                | 400                                      | 2 (0.50)            | 192                                                        | 5 (2.6)          | 422                                      | 20 (4.7)            | 463.5                                                                   |
|                  | Jhargram               | 400                                      | 1 (0.25)            | 224                                                        | 11 (4.9)         | 428                                      | 15 (3.5)            | 180.4                                                                   |
|                  | 24 Paraganas South     | 400                                      | 12 (3.00)           | 229                                                        | 38 (16.6)        | 418                                      | 71 (17.0)           | 1094.3                                                                  |
|                  | Medinipur East         | 400                                      | 2 (0.50)            | 231                                                        | 32 (13.9)        | 404                                      | 52 (12.9)           | 970.9                                                                   |

**Appendix 4. Age and sex characteristics of individuals by enrolment status, Second national SARS-CoV-2 serosurvey, India, August – September 2020**

| Characteristic | Number of individuals participated in the survey (%) | Number of individuals refused to participate in the survey (%) | P value (chi-square test) |
|----------------|------------------------------------------------------|----------------------------------------------------------------|---------------------------|
| Age (Years)    | (n=29,082)                                           | (n=6,133)                                                      |                           |
| 10 – 17        | 3,021 (10.4)                                         | 658 (10.7)                                                     | 0.0001                    |
| 18 – 44        | 16,663 (57.3)                                        | 3495 (57.0)                                                    |                           |
| 45 – 60        | 6,630 (22.8)                                         | 1582 (25.8)                                                    |                           |
| Above 60       | 2,768 (9.5)                                          | 398 (6.5)                                                      |                           |
| Sex            | (n=29,061)                                           | (n=6,127)                                                      |                           |
| Male           | 14,870 (51.1)                                        | 3710 (60.5)                                                    | 0.0001                    |
| Female         | 14,191 (48.8)                                        | 2417 (39.4)                                                    |                           |
| Others         | 21 (0.1)                                             | 6 (0.1)                                                        |                           |

**Appendix 5. Estimated number of infections among individuals aged 10 years above and infection fatality ratio using test characteristics published by manufacturer and external evaluation**

|                                                     | Estimate (95% CI) <sup>1</sup>       | Estimate (95% CI) <sup>2</sup>       |
|-----------------------------------------------------|--------------------------------------|--------------------------------------|
| Estimated number of infections                      | 74,326,463 (65,317,195 - 83,335,732) | 85,038,940 (75,320,204 - 94,757,676) |
| Number of reported COVID-19 cases (10 Aug)          | 2,339,112                            | 2,339,112                            |
| <b>Infection Case ratio (10 Aug)</b>                | <b>31.8 (27.9 - 35.6)</b>            | <b>36.4 (32.2 - 40.5)</b>            |
| Number of reported COVID-19 cases (18 Aug)          | 2,856,248                            | 2,856,248                            |
| <b>Infection Case ratio (18 Aug)</b>                | <b>26.0 (22.9 – 29.2)</b>            | <b>29.8 (26.4 – 33.2)</b>            |
| Number of deaths (31 Aug)                           | 10,058                               | 10,058                               |
| <b>Infection fatality ratio per 10,000 (31 Aug)</b> | <b>9.43 (8.41 – 10.73)</b>           | <b>8.24 (7.40 – 9.31)</b>            |
| Number of deaths (8 Sept)                           | 11,358                               | 11,358                               |
| <b>Infection fatality ratio per 10,000 (8 Sept)</b> | <b>10.65 (9.50 – 12.12)</b>          | <b>9.31 (8.35 – 10.51)</b>           |

<sup>1</sup>Based on sensitivity (100%) and specificity (99.6%) as per manufacturer

<sup>2</sup>Based on sensitivity (92.7%) and specificity (100%) as per external evaluation (Ref: National SARS-CoV-2 Serology Assay Evaluation Group. Performance characteristics of five immunoassays for SARS-CoV-2: a head-to-head benchmark comparison. Lancet Infect Dis. 2020 Sep 23:S1473-3099(20)30634-4)

## Appendix 6. Prevalence of SARS-CoV-2 in various cities/states, India, 2020<sup>1</sup>

| City                             | Study setting                    | Samples tested | Study period    | Seroprevalence (%)            |
|----------------------------------|----------------------------------|----------------|-----------------|-------------------------------|
| Delhi (Round-1)                  | Urban                            | 21,387         | Jun 27-Jul 10   | 23.48                         |
| Delhi (Round-2)                  | Urban                            | 15,000         | Aug 1-7         | 29.1                          |
| Delhi (Round-3)                  | Urban                            | 17,409         | Sept 1-5        | 25.1                          |
| Mumbai <sup>2</sup>              | Urban                            | 6,904          | Jun 29 – Jul 19 | 54.1 (slums), 16.1 (non-slum) |
| Pune                             | Urban                            | 1664           | Jul 20-Aug 5    | 51.5                          |
| Ahmedabad (Round 1)              | Urban                            | 30,054         | Jun 16- Jul 11  | 17.6                          |
| Ahmedabad (Round 2)              | Urban                            | 10,310         | Aug 15-29       | 23.24                         |
| Chennai (Round 1)                | Urban                            | 12,405         | Jul 17-28       | 18.4                          |
| Chennai (Round 2)                | Urban                            | 6366           | Oct 8-15        | 30.1                          |
| Puducherry (Round-1)             | Rural and Urban                  | 869            | Aug 11-16       | 4.9                           |
| Puducherry (Round-2)             | Rural and Urban                  | 898            | Sept 10-16      | 20.7                          |
| Indore                           | Urban                            | 7100           | Aug 11-23       | 7.75%                         |
| District Kashmir <sup>3</sup>    | Rural and Urban (facility based) | 2906           | July 1-15       | 3.6                           |
| Jammu and Kashmir (10 districts) | Rural and Urban                  | 6230           | October         | 38.8                          |
| Karnataka (30 districts)         | Rural and Urban                  | 15,624         | Sept 3-16       | 16.4                          |

<sup>1</sup>Compiled from various media sources/unpublished data

<sup>2</sup>Malani A, Shah D, Kang G, Lobo GN, Shastri J, Mohanan M, Jain R, Agrawal S, Juneja S, Imad S, Kolthur-Seetharam U. Seroprevalence of SARS-CoV-2 in slums versus non-slums in Mumbai, India. *Lancet Glob Health*. 2020 Nov 13:S2214-109X(20)30467-8.

<sup>3</sup>Khan SMS, Qurieshi MA, Haq I, Majid S, Bhat AA, Nabi S, Ganai NA, Zahoor N, Nisar A, Chowdri IN, Qazi TB, Kousar R, Lone AA, Sabah I, Nabi S, Sumji IA, Kawoosa MF, Ayoub S. Seroprevalence of SARS-CoV-2 specific IgG antibodies in District Srinagar, northern India - A cross-sectional study. *PLoS One*. 2020 Nov 11;15(11):e0239303.

STROBE Statement—Checklist of items that should be included in reports of *cross-sectional studies*

|                              | <b>Item No</b> | <b>Recommendation</b>                                                                                                                                                                             | <b>Page No</b> |
|------------------------------|----------------|---------------------------------------------------------------------------------------------------------------------------------------------------------------------------------------------------|----------------|
| <b>Title and abstract</b>    | 1              | (a) Indicate the study's design with a commonly used term in the title or the abstract                                                                                                            | 1              |
|                              |                | (b) Provide in the abstract an informative and balanced summary of what was done and what was found                                                                                               | 1              |
| <b>Introduction</b>          |                |                                                                                                                                                                                                   |                |
| Background/rationale         | 2              | Explain the scientific background and rationale for the investigation being reported                                                                                                              | 1,2            |
| Objectives                   | 3              | State specific objectives, including any prespecified hypotheses                                                                                                                                  | 2              |
| <b>Methods</b>               |                |                                                                                                                                                                                                   |                |
| Study design                 | 4              | Present key elements of study design early in the paper                                                                                                                                           | 2              |
| Setting                      | 5              | Describe the setting, locations, and relevant dates, including periods of recruitment, exposure, follow-up, and data collection                                                                   | 2,3            |
| Participants                 | 6              | (a) Give the eligibility criteria, and the sources and methods of selection of participants                                                                                                       | 3              |
| Variables                    | 7              | Clearly define all outcomes, exposures, predictors, potential confounders, and effect modifiers. Give diagnostic criteria, if applicable                                                          | 3              |
| Data sources/<br>measurement | 8*             | For each variable of interest, give sources of data and details of methods of assessment (measurement). Describe comparability of assessment methods if there is more than one group              | NA             |
| Bias                         | 9              | Describe any efforts to address potential sources of bias                                                                                                                                         | NA             |
| Study size                   | 10             | Explain how the study size was arrived at                                                                                                                                                         | 3              |
| Quantitative variables       | 11             | Explain how quantitative variables were handled in the analyses. If applicable, describe which groupings were chosen and why                                                                      | 3              |
| Statistical methods          | 12             | (a) Describe all statistical methods, including those used to control for confounding                                                                                                             | NA             |
|                              |                | (b) Describe any methods used to examine subgroups and interactions                                                                                                                               | NA             |
|                              |                | (c) Explain how missing data were addressed                                                                                                                                                       | NA             |
|                              |                | (d) If applicable, describe analytical methods taking account of sampling strategy                                                                                                                | Appendix 1     |
|                              |                | (e) Describe any sensitivity analyses                                                                                                                                                             | Appendix 5     |
| <b>Results</b>               |                |                                                                                                                                                                                                   |                |
| Participants                 | 13*            | (a) Report numbers of individuals at each stage of study—eg numbers potentially eligible, examined for eligibility, confirmed eligible, included in the study, completing follow-up, and analysed |                |
|                              |                | (b) Give reasons for non-participation at each stage                                                                                                                                              |                |

|                          |     |                                                                                                                                                                                                              |         |
|--------------------------|-----|--------------------------------------------------------------------------------------------------------------------------------------------------------------------------------------------------------------|---------|
|                          |     | (c) Consider use of a flow diagram                                                                                                                                                                           | Fig1    |
| Descriptive data         | 14* | (a) Give characteristics of study participants (eg demographic, clinical, social) and information on exposures and potential confounders                                                                     | Table 1 |
|                          |     | (b) Indicate number of participants with missing data for each variable of interest                                                                                                                          | Table 1 |
| Outcome data             | 15* | Report numbers of outcome events or summary measures                                                                                                                                                         | Table 2 |
| Main results             | 16  | (a) Give unadjusted estimates and, if applicable, confounder-adjusted estimates and their precision (eg, 95% confidence interval). Make clear which confounders were adjusted for and why they were included | Table 2 |
|                          |     | (b) Report category boundaries when continuous variables were categorized                                                                                                                                    | NA      |
|                          |     | (c) If relevant, consider translating estimates of relative risk into absolute risk for a meaningful time period                                                                                             | NA      |
| Other analyses           | 17  | Report other analyses done—eg analyses of subgroups and interactions, and sensitivity analyses                                                                                                               | NA      |
| <b>Discussion</b>        |     |                                                                                                                                                                                                              |         |
| Key results              | 18  | Summarise key results with reference to study objectives                                                                                                                                                     | 5       |
| Limitations              | 19  | Discuss limitations of the study, taking into account sources of potential bias or imprecision. Discuss both direction and magnitude of any potential bias                                                   | 7       |
| Interpretation           | 20  | Give a cautious overall interpretation of results considering objectives, limitations, multiplicity of analyses, results from similar studies, and other relevant evidence                                   | 5,6     |
| Generalisability         | 21  | Discuss the generalisability (external validity) of the study results                                                                                                                                        | 7       |
| <b>Other information</b> |     |                                                                                                                                                                                                              |         |
| Funding                  | 22  | Give the source of funding and the role of the funders for the present study and, if applicable, for the original study on which the present article is based                                                | 1       |

\*Give information separately for exposed and unexposed groups.

**Note:** An Explanation and Elaboration article discusses each checklist item and gives methodological background and published examples of transparent reporting. The STROBE checklist is best used in conjunction with this article (freely available on the Web sites of PLoS Medicine at <http://www.plosmedicine.org/>, Annals of Internal Medicine at <http://www.annals.org/>, and Epidemiology at <http://www.epidem.com/>). Information on the STROBE Initiative is available at [www.strobe-statement.org](http://www.strobe-statement.org).
